# Supplementary material for: Simultaneous colorimetric detection of nephrolithiasis biomarkers using a microfluidic paper-based analytical device
Source: Royal Society of Chemistry journal article supplement (doi:10.1039/d2ay01648f), 2022-12-19
Supplement: d2ay01648f1.pdf [file d2ay01648f1.pdf]

## Supplementary information

### Simultaneous colorimetric detection of nephrolithiasis biomarkers using a microfluidic paper-based analytical device

Manassawee Janrod<sup>a</sup>, Monpichar Srisa-Art<sup>a</sup>

<sup>a</sup>Electrochemistry and Optical Spectroscopy Center of Excellence, Department of Chemistry, Faculty of Science, Chulalongkorn University, Pathumwan, Bangkok, 10330, Thailand

\*e-mail: [monpichar.s@chula.ac.th](mailto:monpichar.s@chula.ac.th)

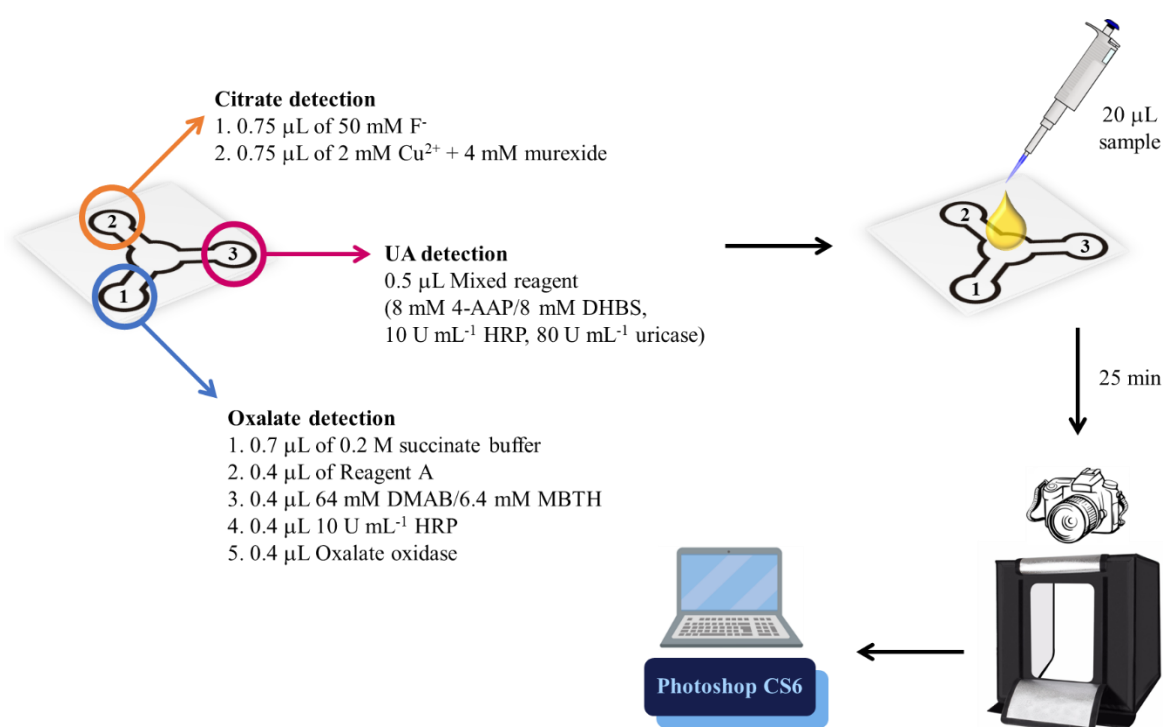

**Figure S1.** A schematic of the overall process for colorimetric detection of citrate, oxalate, and UA using a μPAD.

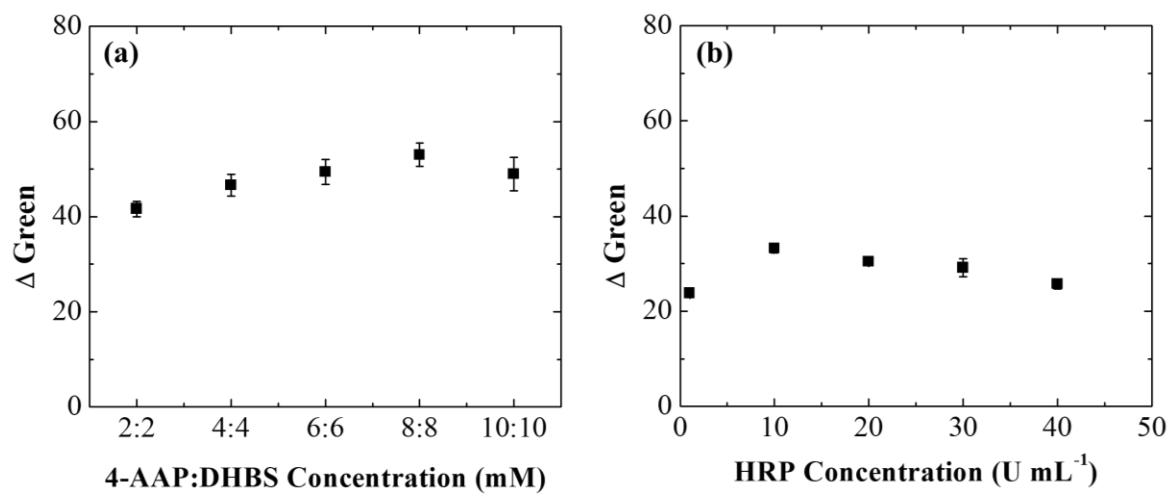

**Figure S2.** Optimizations of (a) 4-AAP/DHBS concentration and (b) HRP concentration for UA detection.

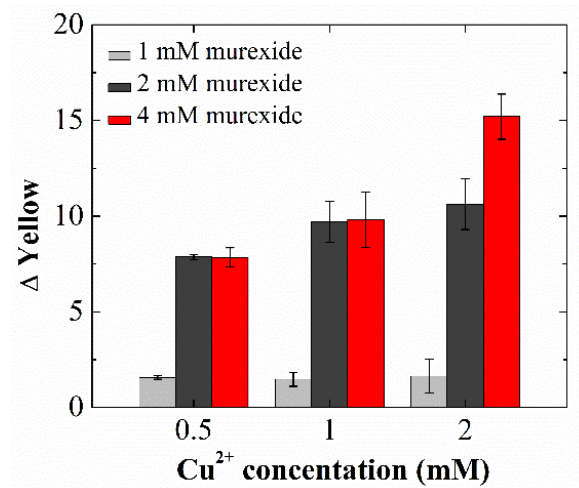

**Figure S3.** Optimizations of  $\text{Cu}^{2+}$  and murexide concentrations for citrate detection.

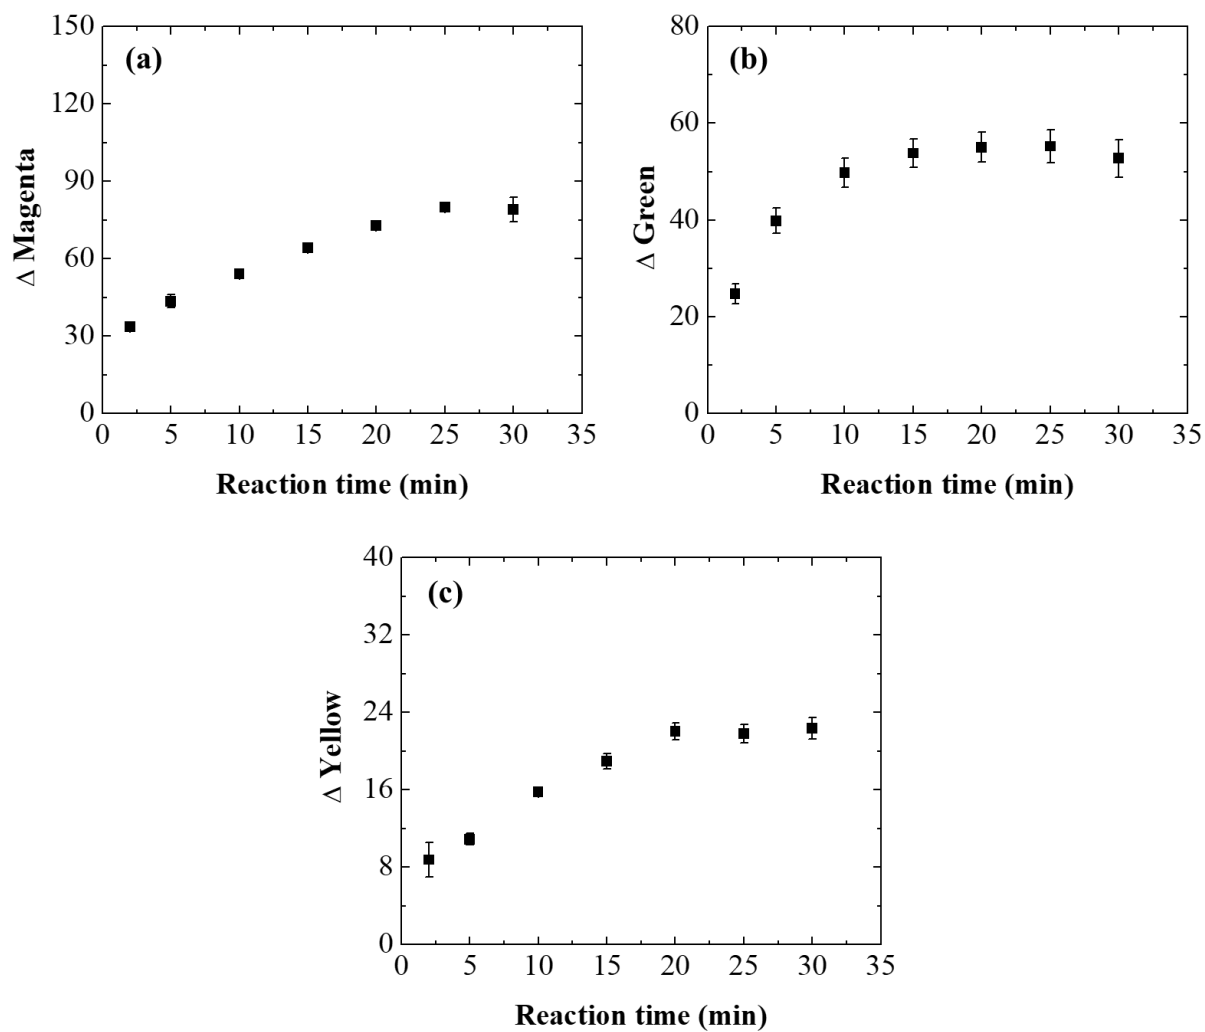

**Figure S4.** Studies of reaction time for determination of (a) oxalate, (b) UA and (c) citrate.

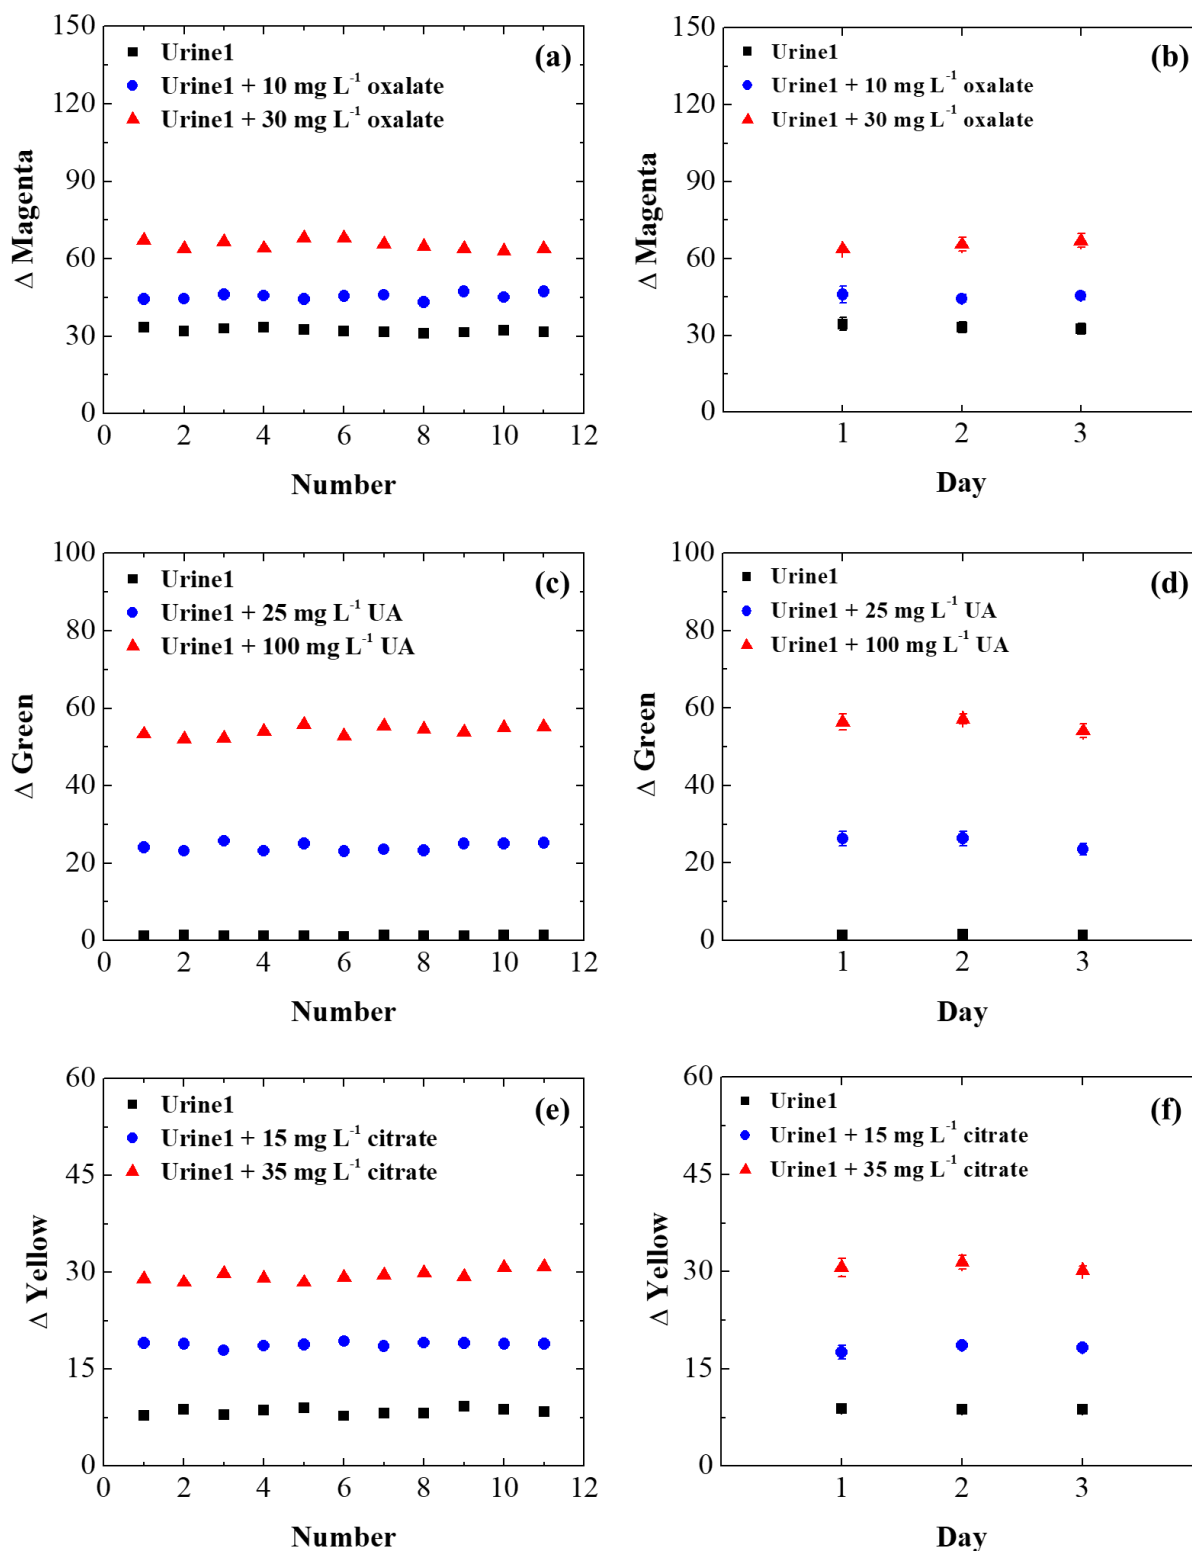

**Figure S5.** Intra-day (a, c and e) and inter-day (b, d and f) measurements of oxalate, UA, and citrate (3) in urine and urine added with 2 concentration levels of each analyte. For intra-day precision, each sample was measured for 11 times ( $n=11$ ). For inter-day precision, the measurements were repeated for 3 days ( $n=3$ ) and 3 replicates for each day.

**Table S1.** The analytical performance for colorimetric detection of oxalate, citrate, and UA using a  $\mu$ PAD.

| <b>Analyte</b> | <b>Linear concentration range (mg L<sup>-1</sup>)</b> | <b>Equation for calibration curve</b> | <b>R<sup>2</sup></b> | <b>LOD (mg L<sup>-1</sup>)</b> | <b>LOQ (mg L<sup>-1</sup>)</b> |
|----------------|-------------------------------------------------------|---------------------------------------|----------------------|--------------------------------|--------------------------------|
| Oxalate        | 2 - 40                                                | $y = 1.5098x + 40.2260$               | 0.9901               | 0.6                            | 2.0                            |
| UA             | 5 - 35                                                | $y = 0.9846x - 2.7204$                | 0.9973               | 2.9                            | 9.8                            |
|                | 10 - 150                                              | $y = 18.567\ln(x) - 36.6360$          | 0.9948               |                                |                                |
| Citrate        | 5 - 45                                                | $y = 0.6905x + 2.9498$                | 0.9969               | 3.1                            | 10.4                           |

**Table S2** The normal concentration levels of components normally found in healthy human urine.

| Components                    | Normal level, mg/24 h (mg L <sup>-1</sup> )* | Studied level | Reference |
|-------------------------------|----------------------------------------------|---------------|-----------|
| Ca <sup>2+</sup>              | < 250 (192)                                  | 200           | 1         |
| Mg <sup>2+</sup>              | 30 - 120 (25-92)                             | 50            | 2         |
| PO <sub>4</sub> <sup>3-</sup> | 600 - 1200 (461 - 923)                       | 900           | 2         |
| Oxalate                       | < 50 (40)                                    | 40            | 3         |
| Citrate                       | > 320 (246)                                  | 230           | 1         |
| AA                            | < 600 (461)                                  | 600           | 4         |
| UA                            | < 750 (577)                                  | 600           | 1         |
| Creatinine                    | < 250 (192)                                  | 250           | 5         |
| ALB                           | < 30 (23)                                    | 30            | 6         |
| Urea                          | 15-40 (11538.46 - 30769)                     | 24000         | 7         |

\* The concentration in the unit of mg L<sup>-1</sup> was calculated using an approximate volume of 1.3 L.

## References

1. S. W. Leslie, H. Sajjad; and K. Bashir, *24-Hour Urine Testing for Nephrolithiasis: Interpretation Guideline*, 2022.
2. H. Han, A. M. Segal, J. L. Seifter and J. T. Dwyer, *Clin Nutr Res*, 2015, **4**, 137-152.
3. C. Barbas, A. García, L. Saavedra and M. Muros, *J Chromatogr B Analyt Technol Biomed Life Sci*, 2002, **781**, 433-455.
4. B. C. Mazzachi, J. K. Teubner and R. L. Ryall, Boston, MA, 1985.
5. *Journal*, 2001.
6. E. Klapkova, M. Fortova, R. Prusa, L. Moravcova and K. Kotaska, *J Clin Lab Anal*, 2016, **30**, 1226-1231.
7. V. Kumar and K. D. Gill, in *Basic Concepts in Clinical Biochemistry: A Practical Guide*, eds. V. Kumar and K. D. Gill, Springer Singapore, Singapore, 2018, DOI: 10.1007/978-981-10-8186-6\_16, pp. 67-70.
